# Supplementary material for: Preparation of a graphene–phosphorene composite by pressure quenching and its ferromagnetism
Source: Royal Society of Chemistry journal article supplement (doi:10.1039/c9cc08887c), 2020-01-01
Supplement: c9cc08887c1.pdf [file c9cc08887c1.pdf]

Supporting Information

## Preparation of graphene-phosphorene composite by pressure quenching and its ferromagnetism

Yunpeng Wu, Qiushi Sun, Deyang Yu, Yifei Teng, Xilong Liu, Yi Feng, Leiyun Han, Xudong Zhao\*, and Xiaoyang Liu\*

State Key Laboratory of Inorganic Synthesis and Preparative Chemistry, College of Chemistry, Jilin University, Changchun 130012, China. E-mail: liuxy@jlu.edu.cn; Tel & Fax: +86-0431-85168316

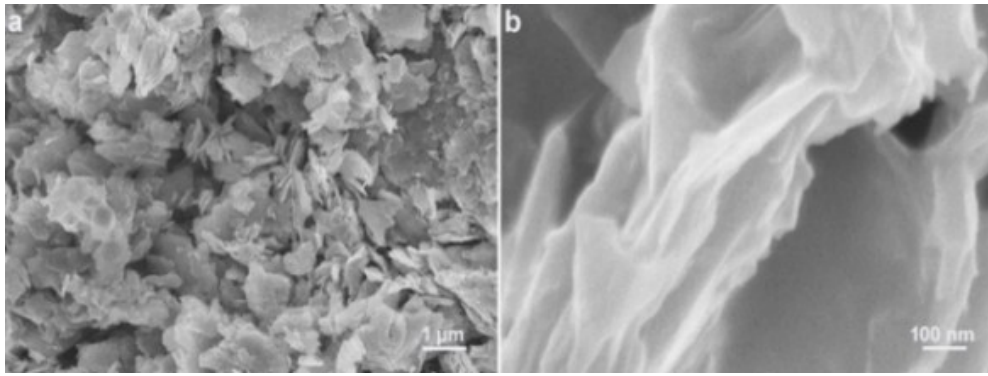

Fig.S1 SEM image of the composite

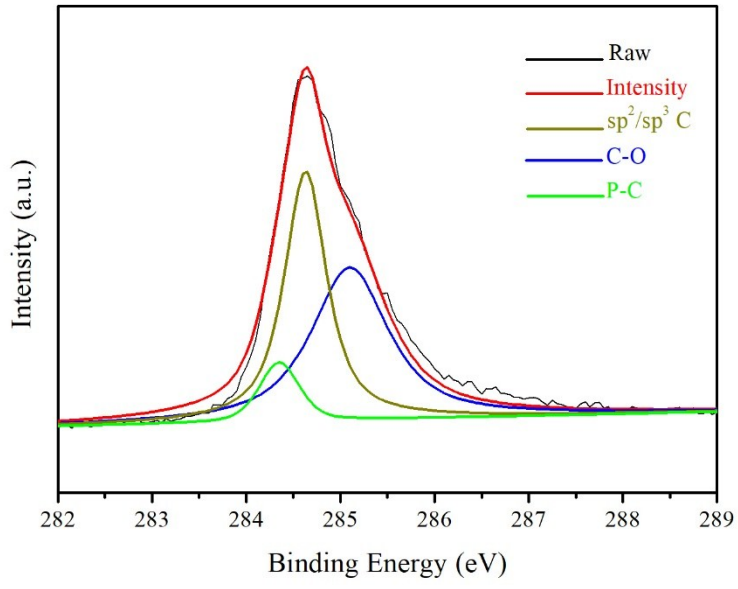

Fig.S2 the C<sub>1s</sub> peak after the Gaussian fitted

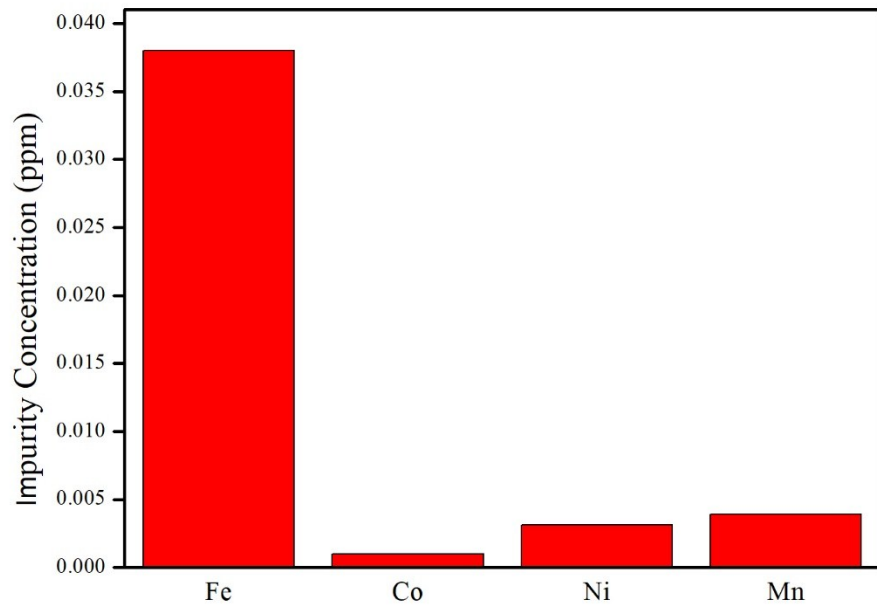

Fig. S3 Contents of the metal impurities (such as Co, Fe, Ni, or Mn) of all the samples measured via ICP-OES
